# Supplementary material
Source: publisher figshare collection journal article supplement (https://acs.figshare.com/ndownloader/files/3615675)
Supplement: Supplementary file 1 [file 3615675]

# Reduction of CO<sub>2</sub> to Trimethoxyboroxine with BH<sub>3</sub> in THF

Koji Fujiwara, Shogo Yasuda, and Tsutomu Mizuta\*

*Department of Chemistry, Graduate School of Science, Hiroshima University, Higashi-Hiroshima, 739-8526*

*JAPAN*

This PDF file includes:

- Experimental section.
- **Figure S1.** <sup>13</sup>C{<sup>1</sup>H} and <sup>11</sup>B{<sup>1</sup>H} NMR spectra for a reaction of commercial BH<sub>3</sub>·THF (Tokyo Chemical Industry) with CO<sub>2</sub>.
- **Figure S2.** <sup>13</sup>C{<sup>1</sup>H} and <sup>11</sup>B{<sup>1</sup>H} NMR spectra for a reaction of purified BH<sub>3</sub>·THF with CO<sub>2</sub>.
- **Figure S3.** <sup>13</sup>C{<sup>1</sup>H} and <sup>11</sup>B{<sup>1</sup>H} NMR spectra for a reaction of purified BH<sub>3</sub>·THF with CO<sub>2</sub> in the presence of NaBH<sub>4</sub>.
- **Figure S4.** <sup>13</sup>C{<sup>1</sup>H} and <sup>11</sup>B{<sup>1</sup>H} NMR spectra for a reaction of purified BH<sub>3</sub>·THF with CO<sub>2</sub> in the presence of HCOONa.
- **Figure S5.** <sup>13</sup>C NMR for the reaction of commercial BH<sub>3</sub>·THF (Tokyo Chemical Industry) with <sup>13</sup>CO<sub>2</sub>.
- **Figure S6.** <sup>11</sup>B NMR spectra of commercial BH<sub>3</sub>·THF (Tokyo Chemical Industry).
- **Figure S7.** <sup>11</sup>B NMR spectra of commercial BH<sub>3</sub>·THF (Aldrich).
- **Figure S8.** <sup>11</sup>B NMR spectra of purified BH<sub>3</sub>·THF with 0.5 mol % of NaBH<sub>4</sub> added.

## Experimental Section

### $^{13}\text{C}\{^1\text{H}\}$ NMR measurement of the reaction mixture.

To estimate the amount of the trimethoxyboroxine formed using  $^{13}\text{C}\{^1\text{H}\}$  NMR spectra, a calibration curve was prepared using the  $^{13}\text{C}\{^1\text{H}\}$  integration intensity of the methoxy carbon signal relative to that of the methyl carbon signal of *p*-xylene which was added as an internal standard. Six THF solutions of different trimethoxyboroxine/*p*-xylene ratios ranging from 0.05 to 0.92 were prepared. A linear plot (correlation factor : $r^2 = 0.9982$ ) was obtained, when integration intensity ratio of the methoxy carbon signal of trimethoxyboroxine to the methyl carbon signal of *p*-xylene were correlated with the trimethoxyboroxine/*p*-xylene molar ratio.

After the reactions were stopped, a known amount of *p*-xylene was added to the reaction mixture, and the integration intensity ratio of the methoxy carbon signal of trimethoxyboroxine to the methyl carbon signal of *p*-xylene was determined on the  $^{13}\text{C}\{^1\text{H}\}$  NMR spectrum of the solution. On the basis of the calibration curve, the intensity ratio was converted to the trimethoxyboroxine/*p*-xylene molar ratio, from which the amount of trimethoxyboroxine was obtained since the amount of *p*-xylene was known. The yields estimated by this method were almost consistent with those determined using the GC analysis of MeOH formed by hydrolysis of  $(\text{MeOBO})_3$ .

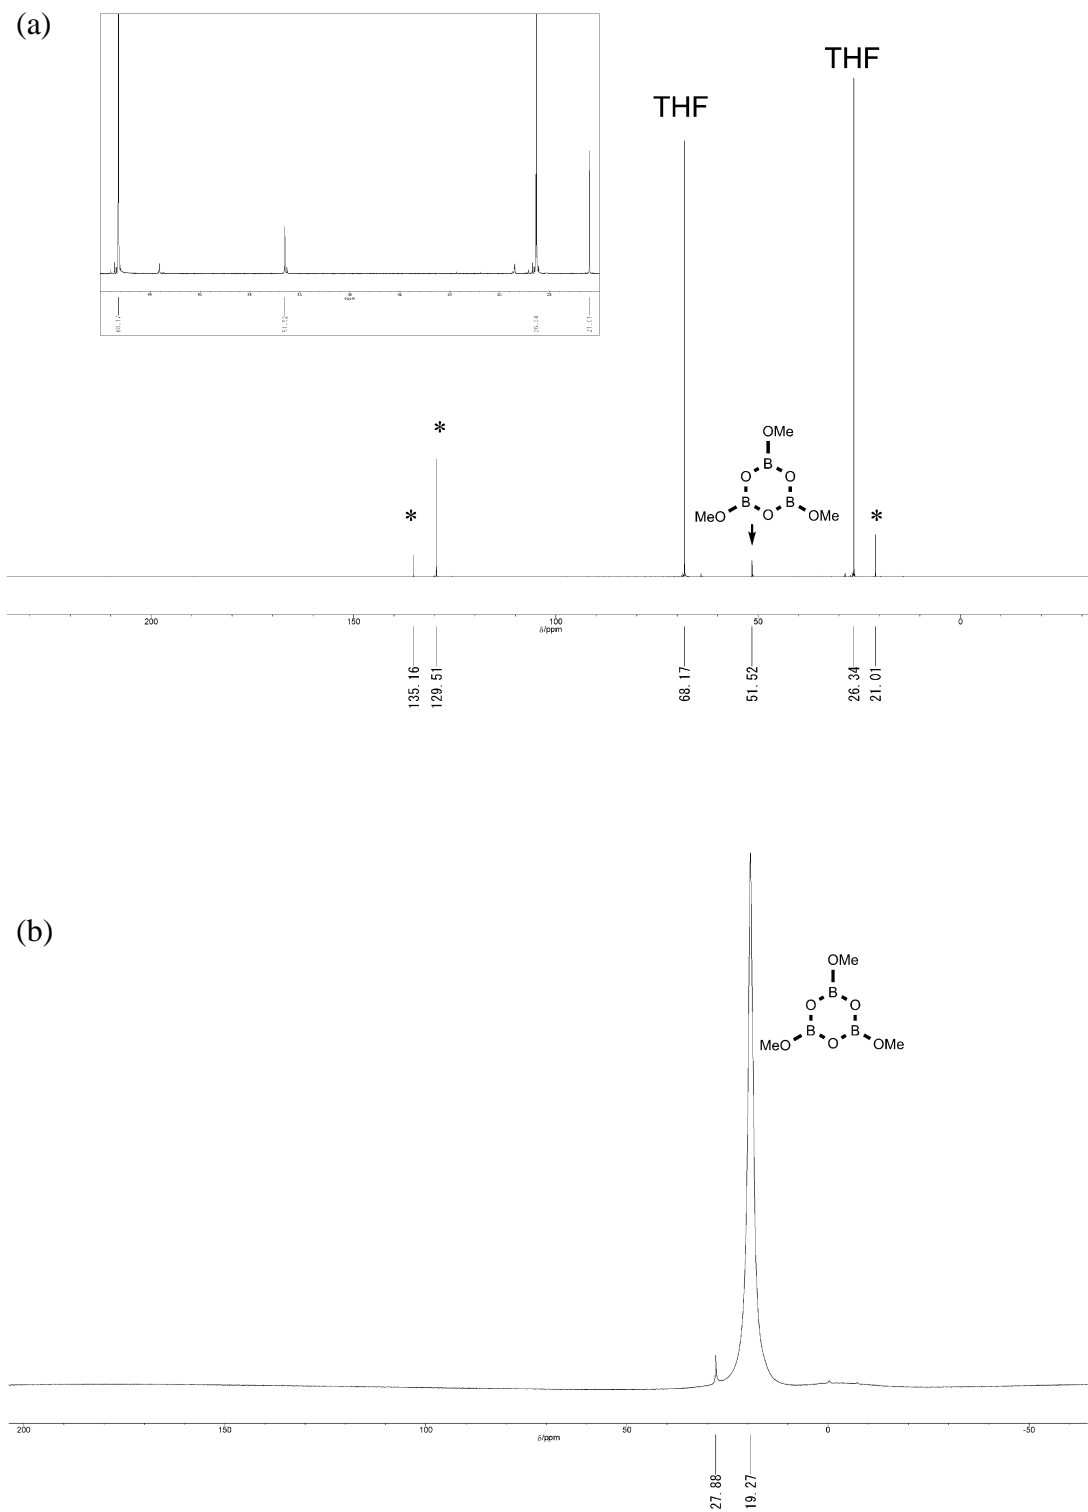

**Figure S1.**  $^{13}\text{C}\{^1\text{H}\}$  (top) and  $^{11}\text{B}\{^1\text{H}\}$  (bottom) NMR spectra of a reaction mixture obtained by the reaction of commercial  $\text{BH}_3\cdot\text{THF}$  (Tokyo Chemical Industry) with  $\text{CO}_2$  for 12 h. The signals with “\*” are those of *p*-xylene added as an intensity standard. The inset of (a) is the magnification of 20 – 70 ppm.

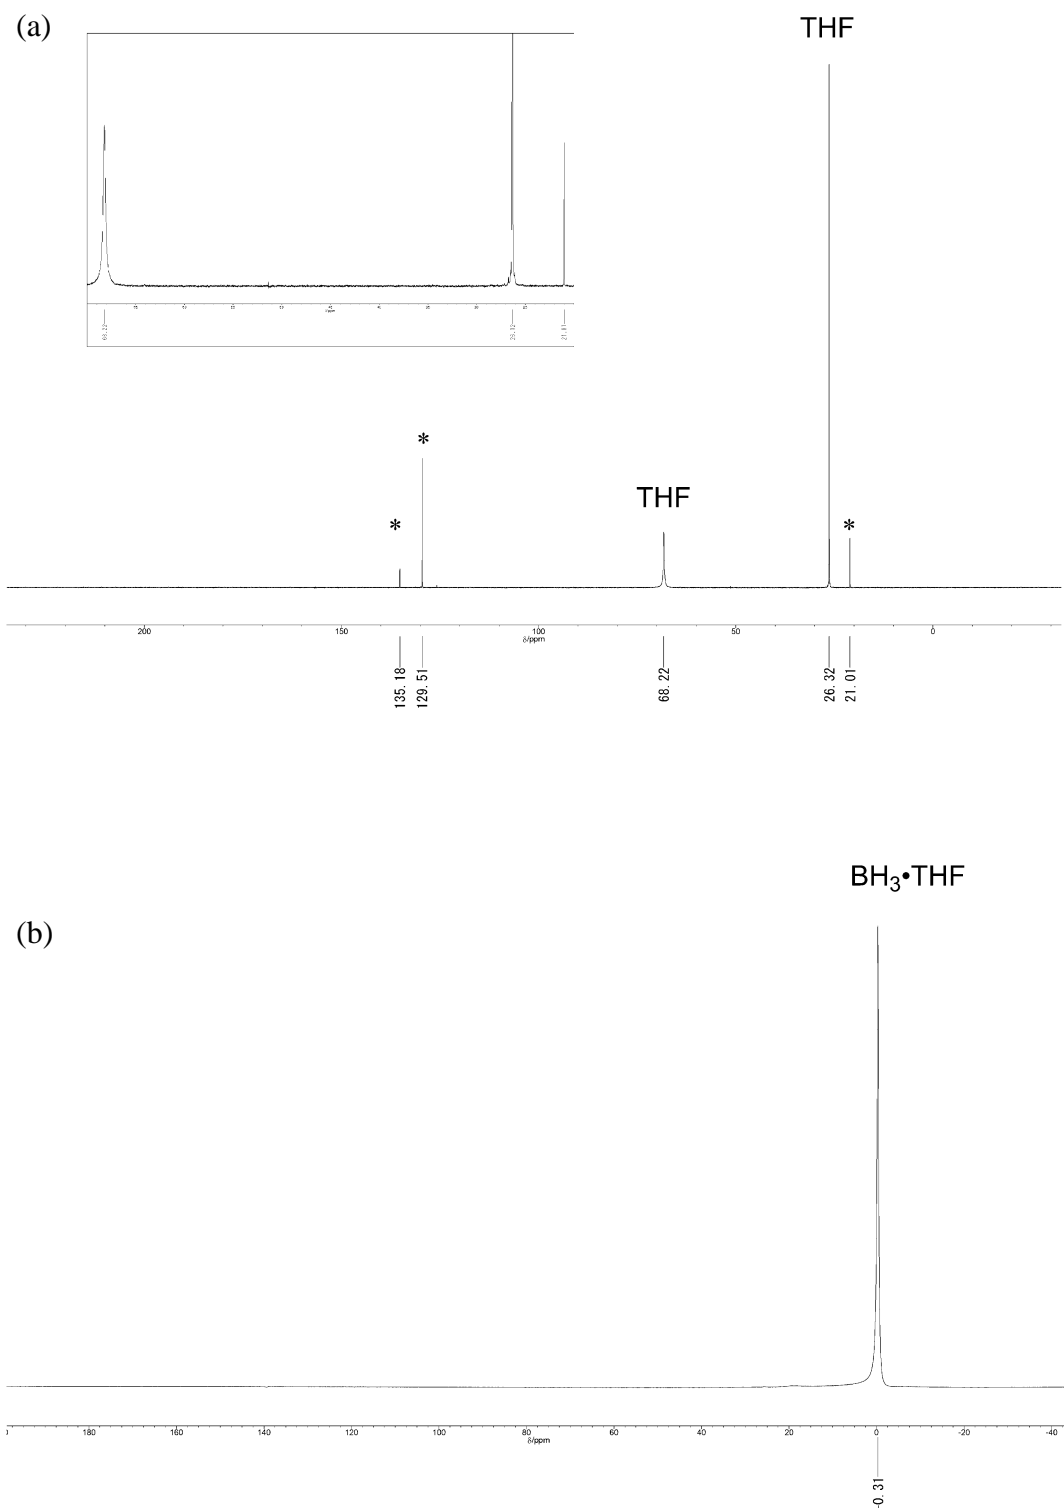

**Figure S2.**  $^{13}\text{C}\{^1\text{H}\}$  (top) and  $^{11}\text{B}\{^1\text{H}\}$  (bottom) NMR spectra recorded after 12 h for the reaction of purified  $\text{BH}_3\cdot\text{THF}$  with  $\text{CO}_2$ . The signals with “\*” are those of *p*-xylene added as an intensity standard. The inset of (a) is the magnification of 20 – 70 ppm.

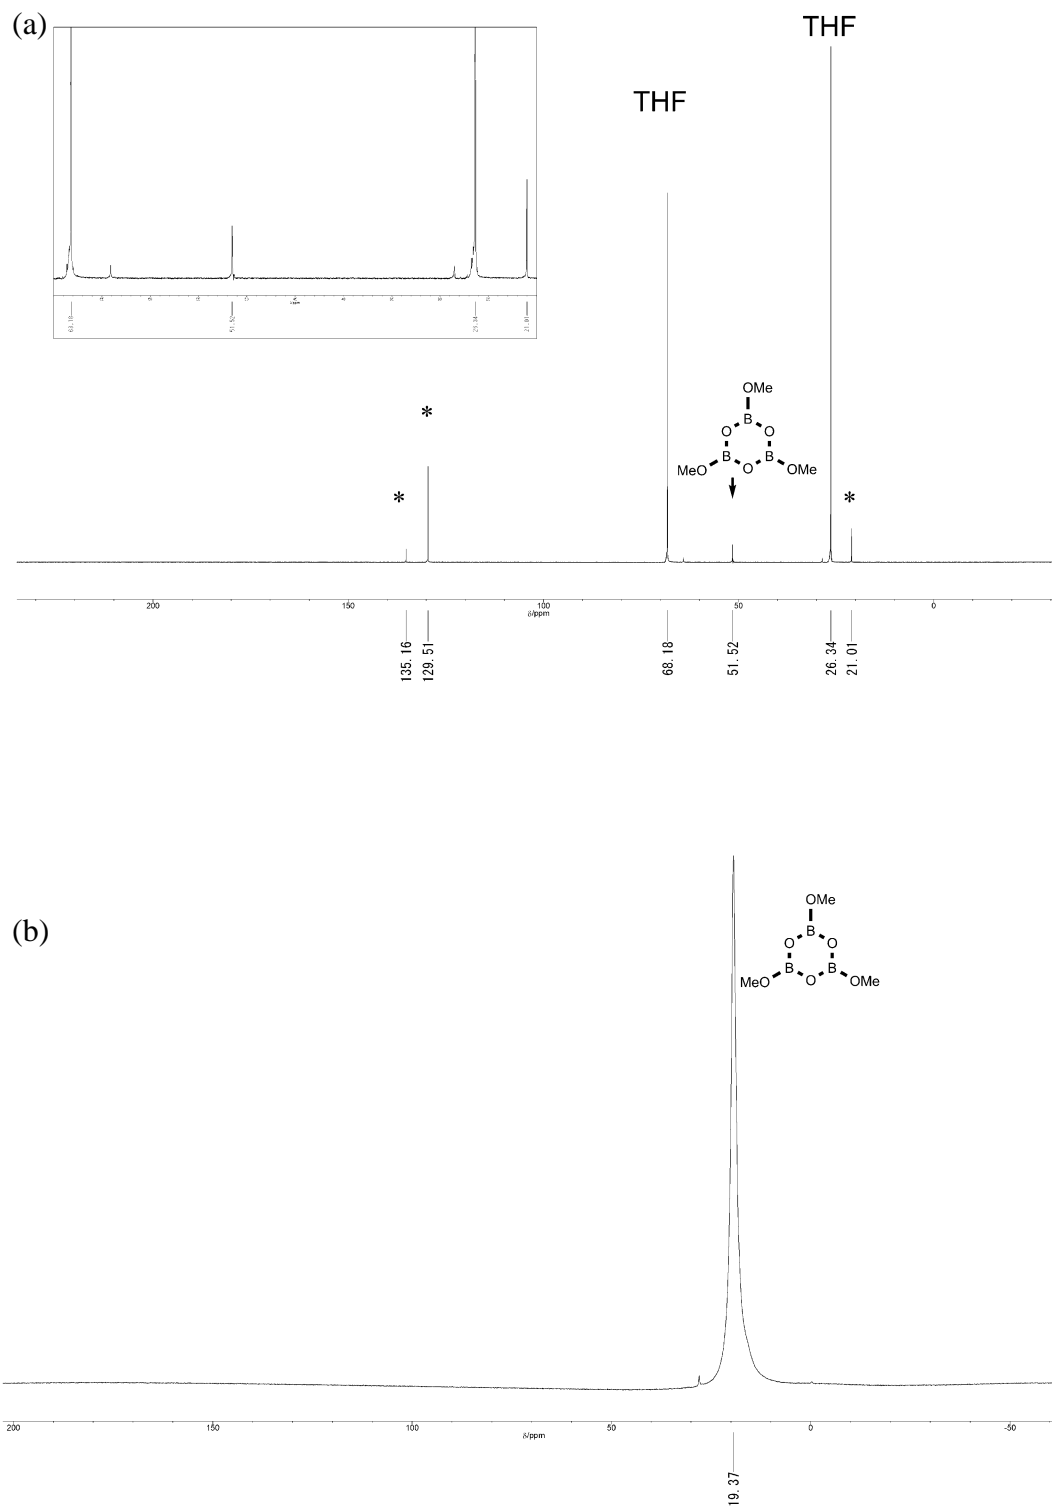

**Figure S3.**  $^{13}\text{C}\{^1\text{H}\}$  (top) and  $^{11}\text{B}\{^1\text{H}\}$  (bottom) NMR spectra recorded after 12 h for the reaction of purified  $\text{BH}_3 \cdot \text{THF}$  with  $\text{CO}_2$  in the presence of  $\text{NaBH}_4$ . The signals with “\*” are those of *p*-xylene added as an intensity standard. The inset of (a) is the magnification of 20 – 70 ppm.

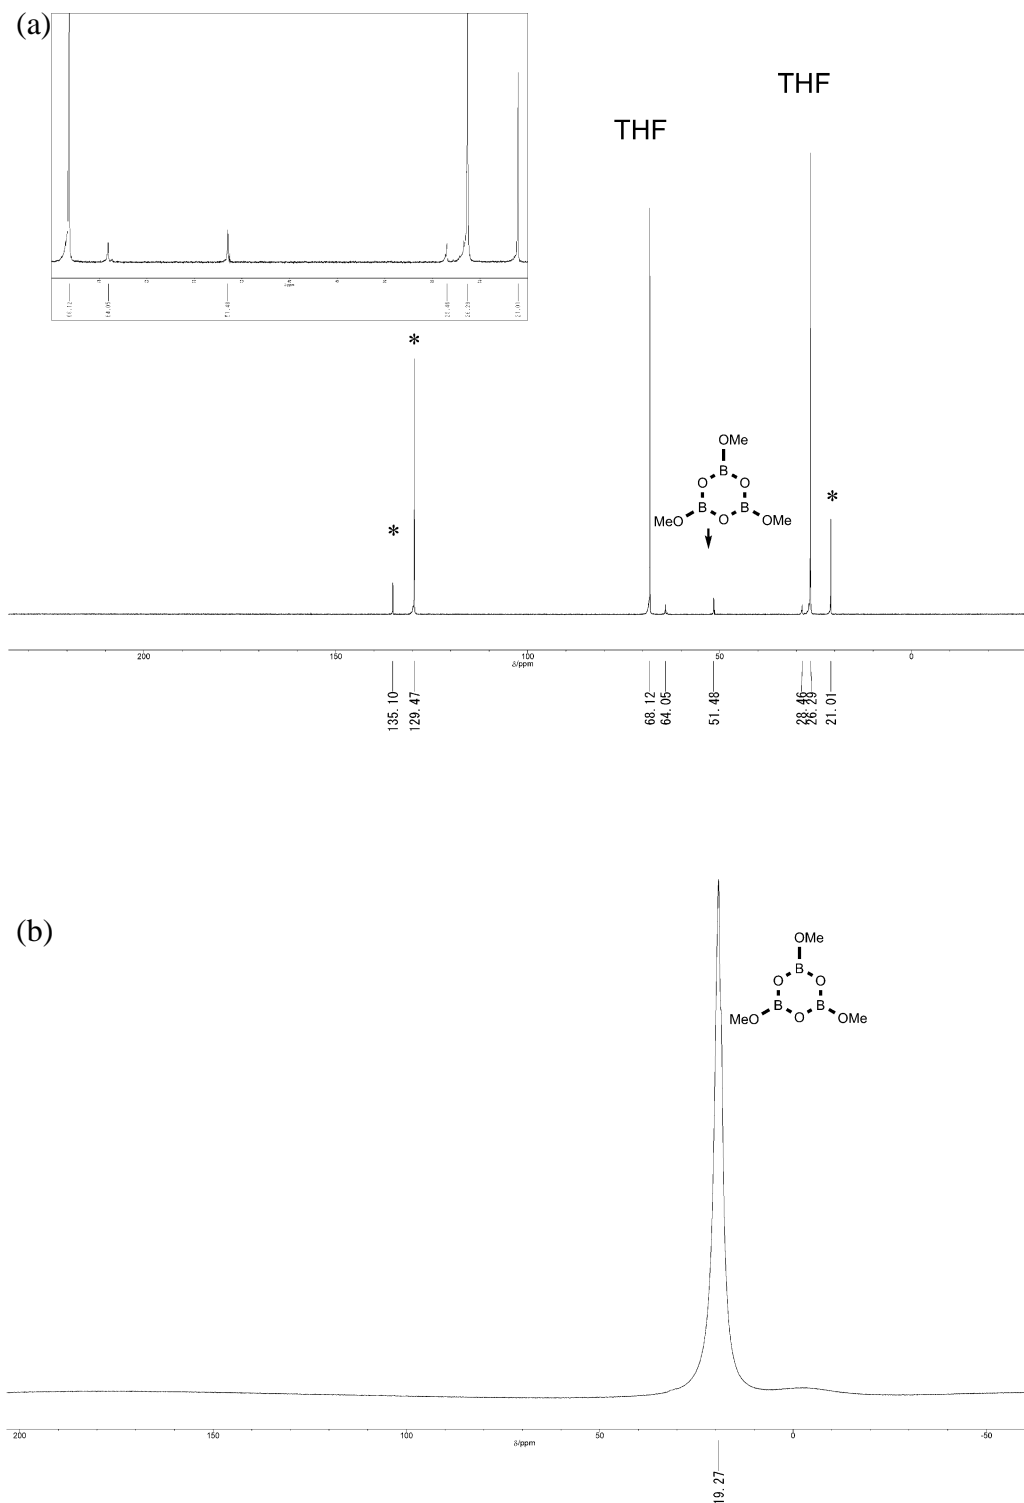

**Figure S4.**  $^{13}\text{C}\{^1\text{H}\}$  (top) and  $^{11}\text{B}\{^1\text{H}\}$  (bottom) NMR spectra recorded after 12 h for the reaction of purified  $\text{BH}_3 \cdot \text{THF}$  with  $\text{CO}_2$  in the presence of  $\text{HCOONa}$ . The signals with “\*” are those of *p*-xylene added as an intensity standard. The inset of (a) is the magnification of 20 – 70 ppm.

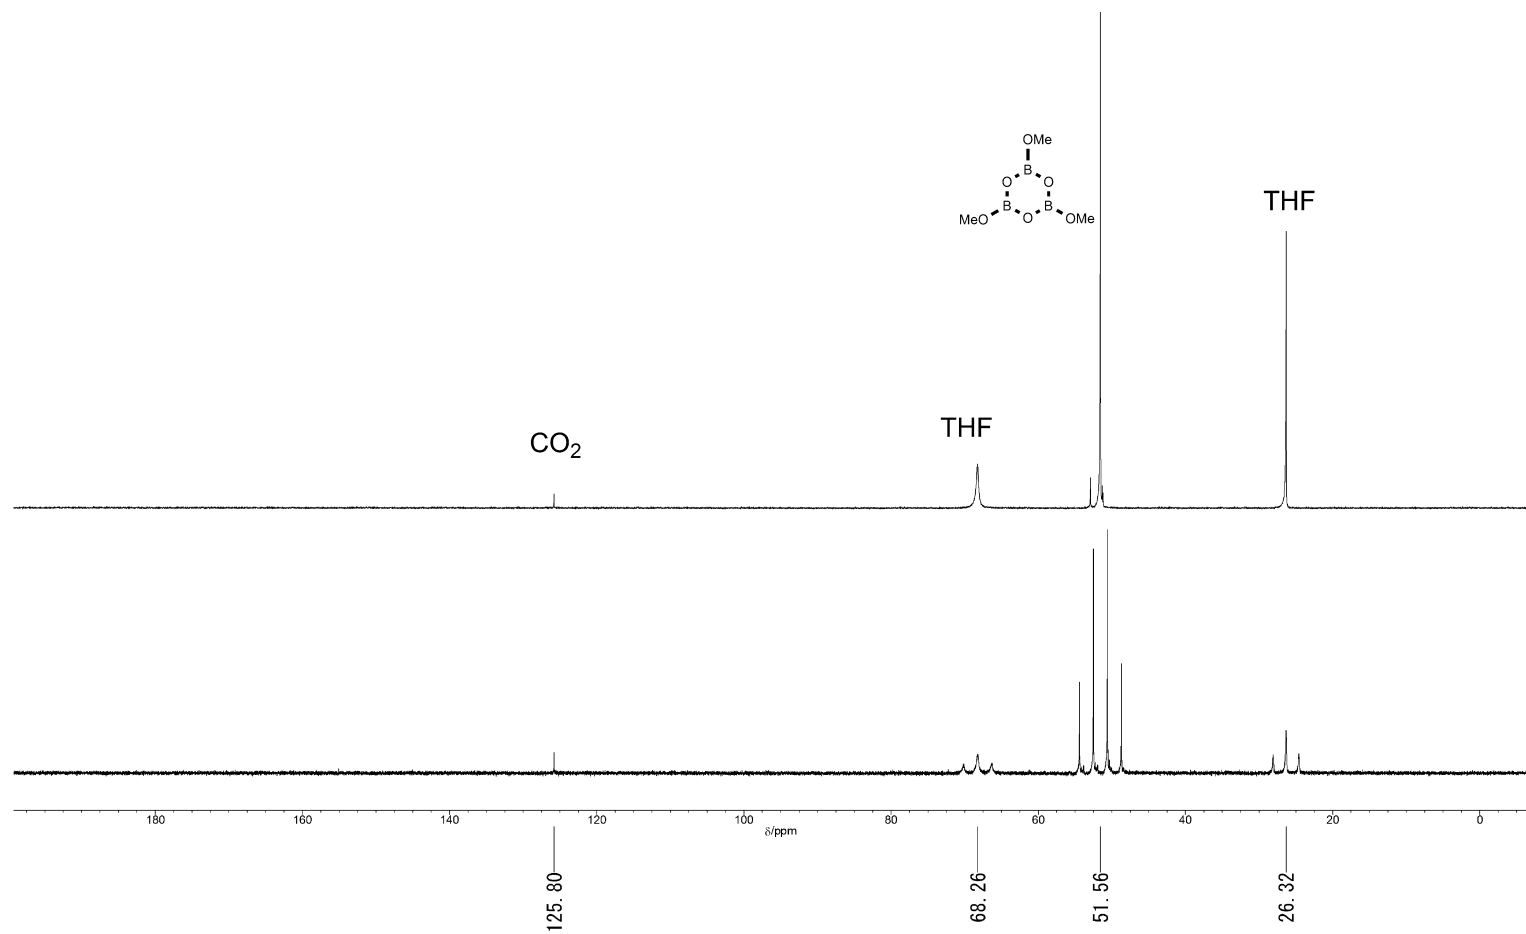

**Figure S5.** Proton-decoupled (top) and non-decoupled (bottom)  $^{13}\text{C}$  NMR spectra recorded after 2.5 h for the reaction of commercial  $\text{BH}_3 \cdot \text{THF}$  (Tokyo Chemical Industry) with  $^{13}\text{CO}_2$ .

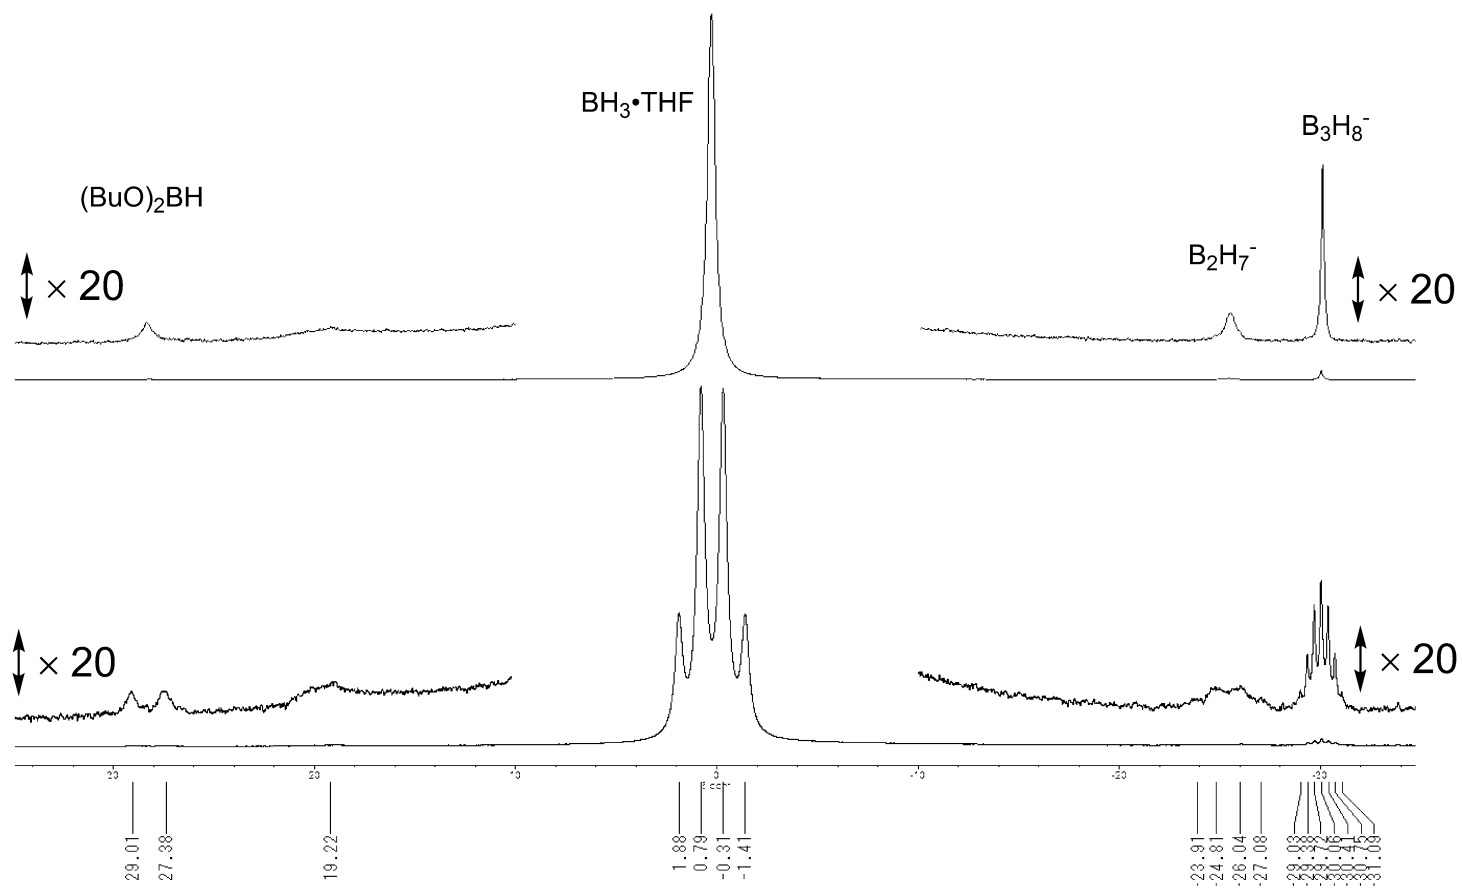

**Figure S6.** Proton-decoupled (top) and non-decoupled (bottom)  $^{11}\text{B}$  NMR spectra of commercial  $\text{BH}_3\cdot\text{THF}$  (Tokyo Chemical Industry).



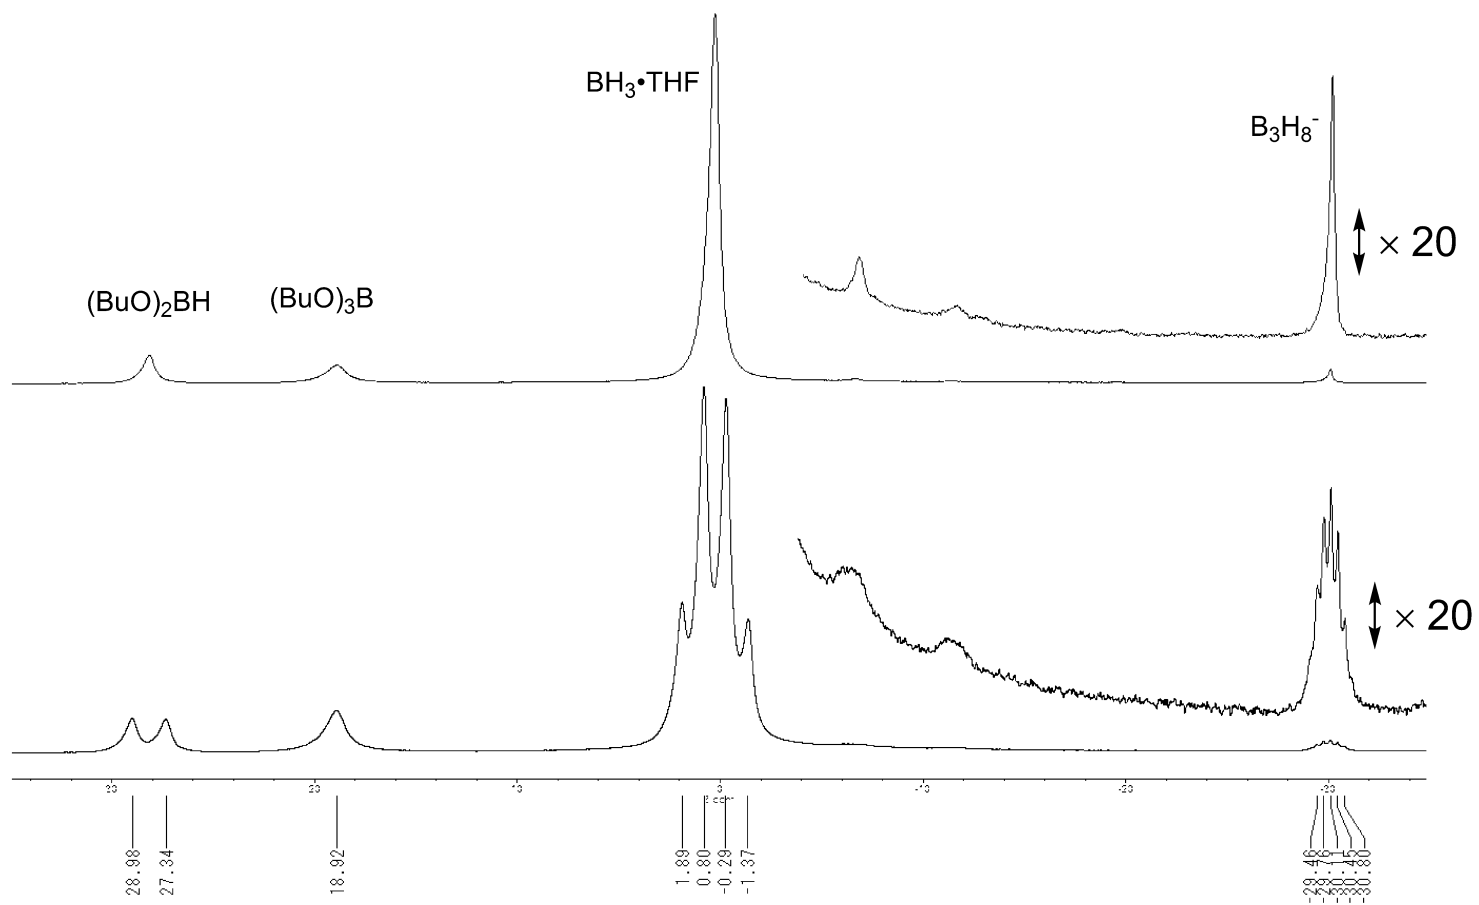

**Figure S7.** Proton-decoupled (top) and non-decoupled (bottom)  $^{11}\text{B}$  NMR spectra of commercial  $\text{BH}_3 \cdot \text{THF}$  (Aldrich).

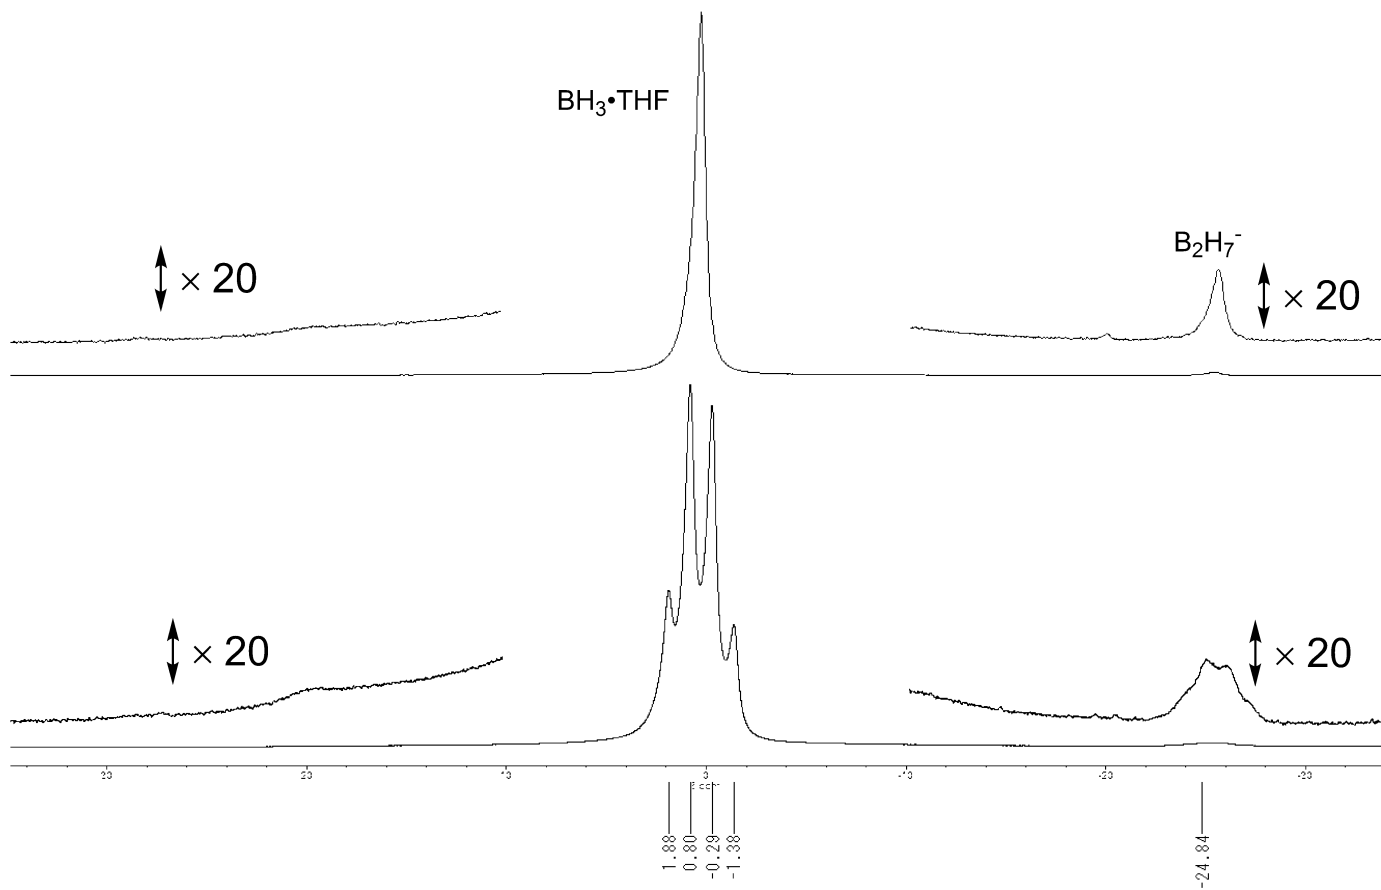

**Figure S8.** Proton-decoupled (top) and non-decoupled (bottom)  $^{11}\text{B}$  NMR spectra of purified  $\text{BH}_3\cdot\text{THF}$  to which 0.5 mol % of  $\text{NaBH}_4$  was added. The  $\text{BH}_4^-$  is converted to  $\text{B}_2\text{H}_7^-$  by the reaction with  $\text{BH}_3$ .
